Anesthesiology  
52:193, 1980

## A Sterile Cover for Repositioning a Pulmonary-artery Catheter

*To the Editor:*—Kopman and Sandza<sup>1</sup> described a method for maintaining the sterility of a pulmonary-artery catheter after placement using a 12-inch catheter.\* The sealed end of the soft plastic cover is cut off and the sheath is passed over the pulmonary-artery catheter. When the pulmonary-artery catheter is in position, the plastic cover is ligated first to the pulmonary-artery catheter and then to the introducer.

As an alternative method, the soft plastic cover of a 16-gauge 24-inch catheter† is used. The metal needle and plastic cannula are removed. The distal end of the plastic cover is cut off and this end is passed over the knurled nob of a Y-piece from a sheath set.‡ The plastic cover is then tied down with a silk suture. The pulmonary-artery catheter is then passed through the

Y-piece and soft plastic cover. The rubber diaphragm of the Y-piece is tightened to fix the Y-piece to the pulmonary-artery catheter. The pulmonary-artery catheter is then inserted in the usual way and when manipulation is finished, the free plastic end slips over the introducer (in the neck) fitting onto the free end. Adjustments to the position of the catheter can be made by grasping the pulmonary-artery catheter through the soft plastic.

GRAHAM W. ERCEG, M.B., CH.B., F.R.C.P.(C)  
*Department of Anesthesia*  
*Medical Center of Central Georgia*  
*777 Hemlock Street*  
*Macon, Georgia 31208*

### REFERENCE

1. Kopman EA, Sandza JG: Manipulation of the pulmonary-artery catheter after placement. Maintenance of sterility. *ANESTHESIOLOGY* 48:373-374, 1978

(Accepted for publication October 11, 1979.)

\* Deseret Intracath, Deseret Pharmaceutical Co., Inc., Cat. No. 3174, Sandy, Utah 84070.

† Deseret Intracath, Deseret Pharmaceutical Co., Inc., Cat. No. 3182, Sandy, Utah 84070.

‡ Desilets-Hoffman Sheath Set, Cook, Inc., Box 489, Bloomington, Indiana 47401.

Anesthesiology  
52:193, 1980

## Origin of the Balloon Technique as an Epidural-space Indicator

*To the Editor:*—It is a common concept in anesthesiology that Professor R. R. MacIntosh developed the balloon technique to identify the epidural space.<sup>1-3</sup> In the March 1979 issue of *ANESTHESIOLOGY*, Drs. Mullin and Sweet cite Professor MacIntosh's publication<sup>4</sup> in their summary of techniques for identifying the epidural space.<sup>5</sup> I would like to mention that Dr. Eugenio Souza, a Brazilian doctor, first described the balloon technique in 1943.<sup>6</sup> This commentary is only to acknowledge an historical fact; my admiration for Professor MacIntosh remains.

CARLOS C. CASTAÑOS, M.D.  
*Professor of Anesthesiology*  
*University of San Andres*

P. O. Box 2912  
La Paz, Bolivia

### REFERENCES

1. Wylie WD, Churchill-Davidson HC: *Anesthesiologia*, Salvat Editores, Barcelona, 1969
2. Lund PC: *Peridural Analgesia and Anesthesia*. Springfield, Ill., Charles C Thomas, 1966
3. Collins VJ: *Principles of Anesthesiology*. Philadelphia, Lea and Febiger, 1976
4. MacIntosh RR: Extradural space indicator. *Anaesthesia* 5:98-99, 1950
5. Mullin V, Sweet RB: A new epidural space indicator. *ANESTHESIOLOGY* 50:244-245, 1979
6. Souza E: Puncao extradural-Tecnica de un nova sinal. *Rev Brasileira de Cirurgia* 12:9-22, 1943

(Accepted for publication October 15, 1979.)

Anesthesiology  
52:193-194, 1980

## Bain PEEP

*To the Editor:*—Dr. Erceg has devised an ingenious method for incorporating positive end-expiratory pressure (PEEP) into a Bain circuit.<sup>1</sup> However, I

believe the method will work only when the patient's lungs are being mechanically ventilated. Since the PEEP valve is applied between the bag attachment
